# Supplementary material for: Combination Genome-wide Association Study and Bulked Segregant Analysis Reveals the Loci Controlling Stalk Fiber Traits Related to Stalk Rot in Maize
Source: Research Square preprint supplement (doi:10.21203/rs.3.rs-7255302/v1), 2025-08-20
Supplement: Supplementary file 3 [file 5281359f0acddb584386e32c.xlsx]

## Sheet: Sheet1
Sample	Sequencing Depth	Clean Reads	Clean Base	Q20(%)	Q30(%)	GC(%)
QM1	32×	235 579 940	70 280 227 863	97.23	92.76	46.23
HZ4	32×	234 893 503	70 160 819 163	97.24	92.7	45.84
BR	31×	232 563 946	69 173 032 212	96.59	91.5	46.86
BQ	31×	232 334 464	69 454 892 520	96.46	91.14	46.04
