# Supplementary material for: Combination Genome-wide Association Study and Bulked Segregant Analysis Reveals the Loci Controlling Stalk Fiber Traits Related to Stalk Rot in Maize
Source: Research Square preprint supplement (doi:10.21203/rs.3.rs-7255302/v1), 2025-08-20
Supplement: Supplementary file 4 [file 60aa0cf185b057d2f1b53ff4.docx]

**Additional file 1. Supplementary Figures S1**. Heterozygosity 4666 SNP markers in the 153 inbred lines.

**Additional file 2. Supplementary Figures S2**. The FarmCPU model was used in the Laiyang area to analyze the traits and construct Manhattan and QQ plots. The x-axis represents the chromosomes, and the y-axis represents the thresholds.

**Additional file 3. Supplementary Figures S3**. The BLINK model was used in the Laiyang area to analyze the traits and construct Manhattan and QQ plots. The x-axis represents the chromosomes, and the y-axis represents the thresholds.

**Additional file 4. Supplementary Figures S4**. The RTM-GWAS model was used in the Laiyang area to analyze the traits and construct Manhattan and QQ plots. The x-axis represents the chromosomes, and the y-axis represents the thresholds.

**Additional file 5. Supplementary Table S1**. DNA libraries for sequencing data quality.

**Additional file 6. Supplementary Table S2**. Indel-labeled primers.
