# Supplementary material for: Combination Genome-wide Association Study and Bulked Segregant Analysis Reveals the Loci Controlling Stalk Fiber Traits Related to Stalk Rot in Maize
Source: Research Square preprint supplement (doi:10.21203/rs.3.rs-7255302/v1), 2025-08-20
Supplement: Supplementary file 7 [file d83fb90ba7df21b2c75487f6.xlsx]

## Sheet: Sheet1
	Gene_ID	Sequence information F：	Sequence information R：
1	40690160	TTCAATGCGATCAACAAAGG	CCCAGCCGTAGATGTTCCTA
2	40690328	TTCAATGCGATCAACAAAGG	CCCAGCCGTAGATGTTCCTA
3	42228514	CTGGTCAGGGCTTCCTGTAG	CGAATAGTGTTCACCCACCC
4	42441382	AAATGCAAAATGCCAACCTC	TCCCTGGAGAACAAGACCAC
5	43378006	TAGACACTCGGCAAAGAACG	CAGCAAAAATCCAGTCACCA
6	46513759	CCGTAAAAGCGAAGATGTGA	ATGAAAATGGGAAGGCAGTG
7	46876403	CTTAGTCCCCACAAGGACCA	AAGTCCGGAATCACTCCAAA
8	47578368	AACCCCTAACCCTAACCCCT	CGTACAACTCTCCCTCTCTATACATTC
9	47578510	AACCCCTAACCCTAACCCCT	ATCCGATCCGATCACGATAA
10	47709951	AATAAGGTCCGCATGAGACG	CATGGGGCTTCCATTATTTG
11	88352121	AAGAAAGGCAATCCAAGCAA	AGACTTTGCCAACGGCTAGA
12	88362060	ACTCACATGCGAAGGGGTAA	GGATCCAACTTGCAGGAGAA
13	90805502	AATTCATAGTGCGGACGCC	GAACACCAAGATGGACCCAC
14	90805691	AATTCATAGTGCGGACGCC	GAACACCAAGATGGACCCAC
15	91584816	AGCACGAAAGGTGGTCTGAT	CAGGTTTGTCGGTACCGTTT
16	91965140	AAATGCCTCGCTCCAGAAG	AACTGGATGCCGTCATATCC
17	91965266	AAATGCCTCGCTCCAGAAG	AACTGGATGCCGTCATATCC
18	92002645	AAAAAGTCAACGACGTCACAT	TTGGATCAGGGCTTCCTCTA
19	92131255	GCAGTACCAGTAGCGGTGGT	TCCTCCTCCCCCTCCTACTA
20	92131681	GCAGTACCAGTAGCGGTGGT	TCCTCCTCCCCCTCCTACTA
21	116658779	AAAAAGCCAAAGCAGTCCAA	CGAGGCAGAGACAGAAAAGG
22	116658872	AAAAAGCCAAAGCAGTCCAA	CGAGGCAGAGACAGAAAAGG
23	117280667	CCCAAAATGCTCATGAAGGT	AGATCCACTACCTGCGCCTA
24	117280692	CCCAAAATGCTCATGAAGGT	AGATCCACTACCTGCGCCTA
25	140368247	AAGATGATTCAATGTGCCAAA	CCCCATTCCTCTCTAGGACC
26	141103867	AAACCAAAGAAGCCTAGCCG	AAGGAGAGGAGAGGGACTGC
27	88788073	ACTGTGATTTGTGAGTTTTTGTAT	ATCATCCTTTGCTTTGACCG
28	90816056	AAACCTTCTCCCCCTTTTTG	ATTTTGATGATCGGGAGCAG
29	90924852	GAAAAGGATAAAGCAGCCCA	CACGACGCAGAGAGAGAAGA
30	90968835	ACGGTCGTCCCGTATCAAT	TGATTTGGTGGGTGTGAATG
31	91734946	ATAAAGAAGGCGAGCGAAGG	GAGGATTACAGATCGAGGCG
32	91759217	GATCGTGGGCAAGAGGTTAG	CTCTCTCGCTGCTCTGTGG
33	91968876	CAAATAGCGAGATGGGTGCT	CGGGTTGAGCAATGGACTAT
34	91979499	AAGGAGGAGGTCAACAAGCA	AAGGCTTGATGCCACAAAGT
35	92131255	TAGTAGGAGGGGGAGGAGGA	ATTGTGGCTGTTGTTGTTGC
36	92131537	GCAGTACCAGTAGCGGTGGT	TCCTCCTCCCCCTCCTACTA
37	116580177	AATTTTGGAAAGGGCTCGAC	GGGCCAAATCATGTCTAGGA
38	116642505	TCTGAGGTTTTCATACGGGG	GAAGAGGGGCAAGACGAATA
39	116659547	AAAAGCCAAAGCAGTCCAAC	CGAGGCAGAGACAGAAAAGG
40	117651245	CTCTTCCCTCTTCCCTCCAC	CTATGCCACCATGTCTCTAGC
41	140535305	AAGGAGAATGAACGAGCGTG	GCATGTGTGTGGCTTGTCC
42	140535340	CGACAATTTGCACACAAAGG	CTTACACGACGTGGCCCT
43	116341126	CTCCCACAAGATGGAAGGAA	ACCATTCTGATTCGGTGAGG
44	116439013	TGGACGAATGATTGAACGAA	TATACGTACGCCTCCGGTGT
45	116541412	CATGCGAAGGAGAAAGAAGG	TCTCAAATCTGGCCCAAAAC
46	116603892	TGCGGAAATGTGTATGTTGC	CATGTCAACTTCGGCTCTCA
47	116615470	ACTGACCTGAACCTGGCATC	TAACGCCTGATTAGCCGAAC
48	116624416	CAACACGACTGACATGAGGG	CTTGCCTTGGAGTAAGAGCG
49	116639753	TTACATTGGGAAAAACCCCA	TAAATGATTGGCACTTCCCC
50	116639830	TACATGGGAAAAACCCCAAA	TAAATGATTGGCACTTCCCC
51	116640254	GGAAAAACCCCAAACCCTAA	TAAATGATTGGCACTTCCCC
52	116659547	AAAAGCCAAAGCAGTCCAAC	CGAGGCAGAGACAGAAAAGG
53	116659616	GGTTCCACCTGTCAGCGG	CGAGGCAGAGACAGAAAAGG
54	116671708	TACGTCTCGTATGGCTCGTG	CAGAAGAGGTAGCCTTCGCA
55	116693397	ATGGGGGTTAGAGGAGGATG	CCTCTCCTGGGCCATCTG
56	116704059	GAAGCACGGCCCATTTAATA	CCACGACCTCCCTCTACAAG
